# Supplementary material
Source: bioRxiv or medRxiv preprint supplement (https://medrxiv.org/highwire/filestream/96920/field_highwire_adjunct_files/0/2020.09.10.20191486-1.pdf)

## SUPPLEMENTAL MATERIAL

### Characterization and Phase 1 Trial of a B Cell Activating Anti-CD73 Antibody for the Immunotherapy of COVID-19

## SUPPLEMENTAL FIGURE LEGENDS

### Supplemental Figure 1

A) CPI-006 does not induce ADCC. MDA-MB-231 cells were incubated with increasing concentrations of CPI-006 or anti-EGFR antibody Erbitux (positive control). ADCC activity was determined in two independent experiments with human PBMCs from 2 human donors. B) Binding of CPI-006 or MEDI9447 to recombinant CD73-His was measured by Octet.

### Supplemental Figure 2

CPI-006 does not increase the titer of antibodies to unrelated viral antigens in advanced cancer patients.

## SUPPLEMENTAL METHODS

### Cell lines

MDA-MB-231 was purchased from ATCC. For complete knock out of CD73 expression, CRISPR technology was employed with plasmids obtained from Santa Cruz Biotechnology.

### Reagents

5'-AMP, adenosine 5'-( $\alpha,\beta$ -methylene) diphosphate (APCP), and 5'-(N-Ethylcarboxamido) adenosine (NECA) were purchased from Sigma-Aldrich. Anti-CD3 (clone HIT3a) and anti-CD28 (clone CD28.2) were purchased from BD Biosciences. Recombinant CD73-His was produced in 293-6E cells and purified by Ni-NTA (Novagen) and size exclusion Superdex 200 (GE Healthcare) chromatography. Anti-IgM microbeads were purchased from Miltenyi Biotec and were used at a 1:100 dilution.

### Flow cytometry for preclinical in vitro assays.

Binding of unlabeled recombinant antibodies was detected with PE anti-human secondary (Jackson ImmunoResearch) and analyzed using the CytoFLEX flow cytometer (Beckman Coulter). For competition experiments, MDA-MB-231 cells were preincubated with APCP for 30 minutes at 37°C prior to staining with unlabeled CPI-006 or MEDI9447 and detection with secondary antibody. Antibodies to CD3, CD19, CD73, CD69 were purchased from BD Biosciences. Antibodies to MHC-II, CD86, CD83 were purchased from Biolegend. Other antibodies to human IgG lamda (clone 34660, catalog #562514), CD27 (clone M-T271, catalog #562514), CD38 (clone HIT2, catalog # 561106),

CD138 (clone MI15, catalog # 341097), and IgM (clone G20-127, catalog # 562030) were purchased from BD Pharmingen.

#### Adenosine related T cell functional assays

PBMCs were labeled with Cell Trace Violet (Thermo Fisher). Labeled PBMCs were reconstituted in RPMI 1640 media with 10% FBS and 200 units/mL IL-2 and seeded at a density of  $6 \times 10^5$  cells/well in 96 well round bottom tissue culture plates. Anti-CD3 and anti-CD28 were added to each well at a final concentration of 1  $\mu$ g/mL. CPI-006, ciforadenant, or human IgG1 isotype control was added to each well at the final concentrations indicated in the figure legends. 5'-AMP was added to each well at final concentration of 3 mM and cells were incubated for 4 days at 37°C, 5% CO<sub>2</sub>.

For flow cytometry analysis of T cell proliferation, duplicate wells were pooled and stained with PerCP-Cy5.5 anti-CD3 (BD Biosciences). After staining, cells were washed and fixed with 4% PFA and analyzed using the CytoFLEX flow cytometer. Data were analyzed with FlowJo software and proliferating CD3+ T cells were identified by gating relative to control cells not stimulated with anti-CD3/anti-CD28 or AMP. To compile data derived from multiple donors, experimental values were normalized to the value derived from cells stimulated with anti-CD3/anti-CD28 in the absence of AMP for each donor.

To evaluate cytokine secretion, experimental cultures were set up as described above except that cells were seeded at a density of  $1.5 \times 10^5$  cells/well and labeling with Cell Trace Violet was omitted. Interferon gamma levels were measured using the IFN- $\gamma$  human AlphaLISA Detection assay kit (Perkin Elmer). Data from multiple donors were compiled as described above.

#### CD73 enzymatic activity assays

To assess the ability of anti-CD73 antibodies to inhibit CD73 activity, cells were incubated with antibodies prior to addition of 250  $\mu$ M AMP. Phosphate levels were measured in the cell culture supernatant using the Sensolyte Malachite Green assay kit (AnaSpec). CD73 activity was also measured using the CellTiterGlo assay kit (Promega) as previously described [19, 40]. A cell free reaction was used to determine maximum inhibition of the CellTiterGlo reaction by AMP.

#### Isolation of primary cells

LRS chambers containing white blood cell concentrate after plateletpheresis were obtained from healthy donors through the Stanford Blood Center. PBMC were isolated by Ficoll Paque gradient (GE Healthcare) and B cells were purified using the EasySep Human B cell isolation kit (Stemcell Technologies).

#### Chemokine analysis

CCL2, CCL3, CCL4, and CCL22 levels were measured using Quantikine ELISA kits (R&D Systems).

#### Antigen-specific IgG measurement

Abcam ELISA Kits were used to measure human anti-Mumps (ab108752), CMV (ab108724), Rubella (ab108767), Measles (ab108750), HSV1 (ab108737) IgG level.

# Supplemental Figure 1

A

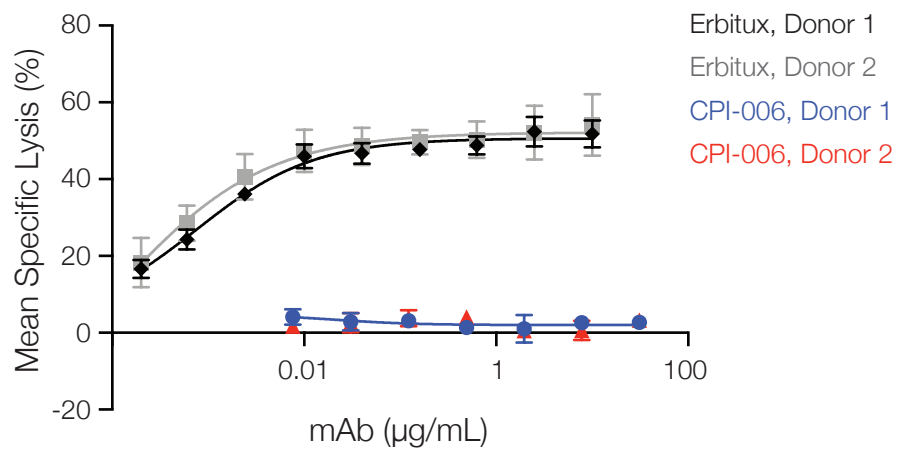

B

| Antibody | KD (M)   | Kon (1/Ms) | Kdis (1/s) |
|----------|----------|------------|------------|
| CPI-006  | 2.07E-10 | 3.18E+05   | 6.58E-05   |
| MEDI9447 | 9.05E-11 | 4.40E+05   | 3.98E-05   |

# Supplemental Figure 2

## A

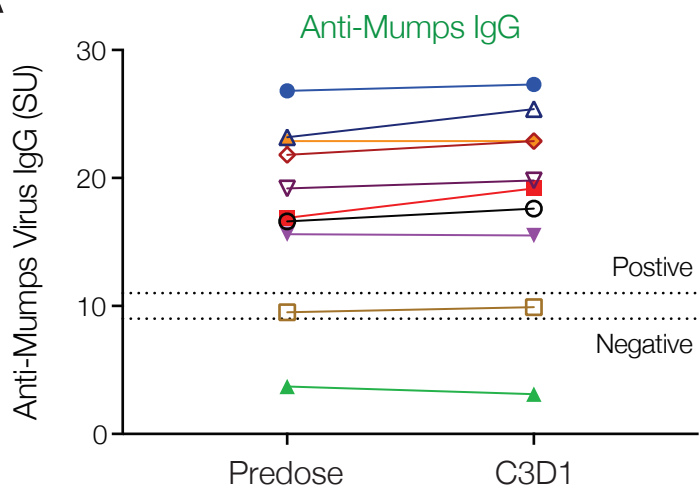

## B

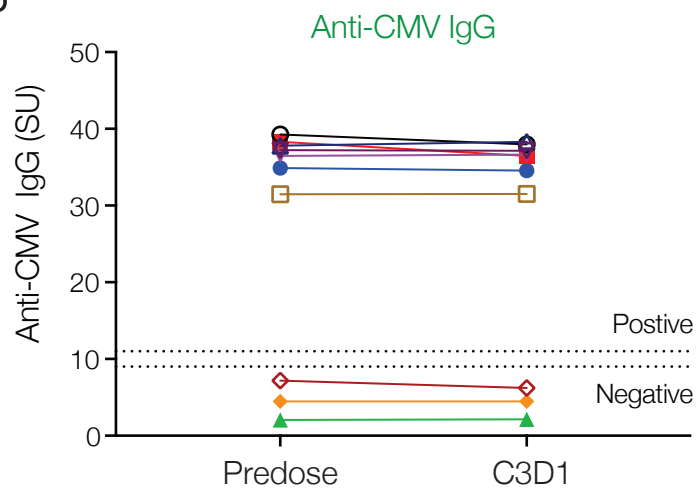

## C

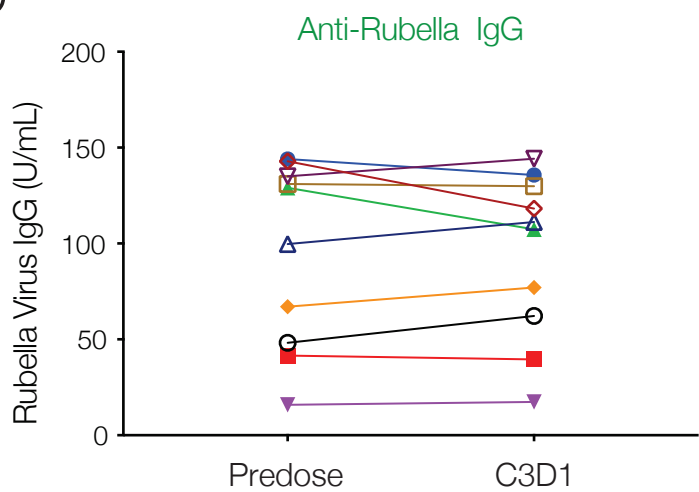

## D

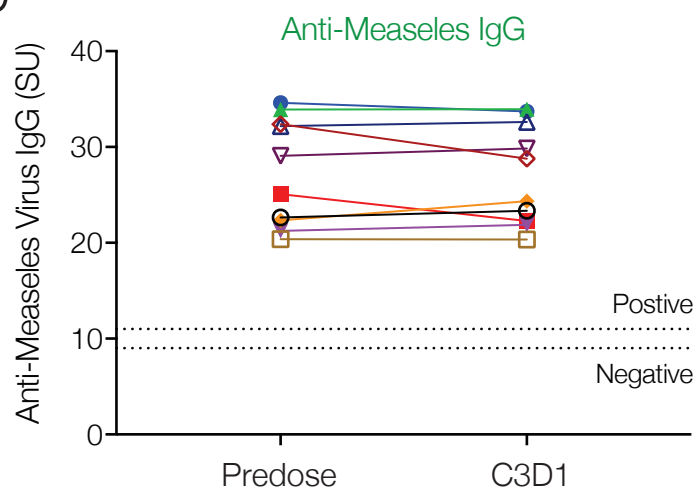

## E

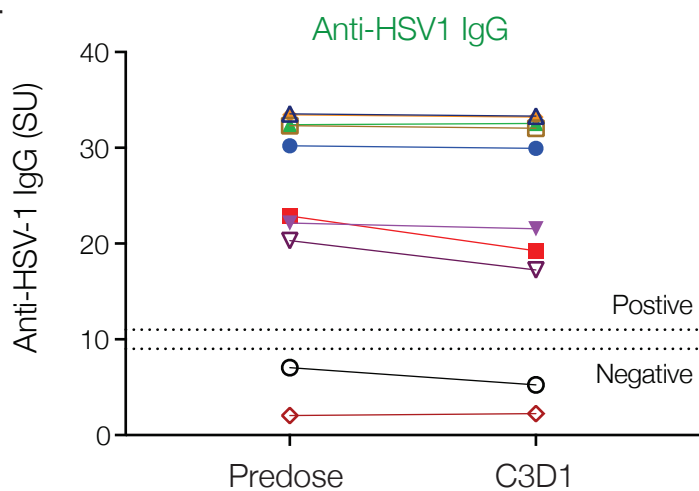

Supplement: Supplementary file [file 2020.09.10.20191486-1.pdf]
